# Supplementary material
Source: Elsevier journal article supplement (https://authors.library.caltech.edu/46150/7/mmc1.docx)
Supplement: mmc1 [file mmc1.docx]

**Supplemental material**

**Mental function questionnaire**

1) It changes its action depending on the contents of what I say.

2) When I call it, it directs its attention in the direction of my voice.

3) It looks at my face.

4) If I continue to stroke it gently, it shows friendly behavior toward me.

5) When I smile at it, it changes its behavior accordingly.

6) It imitates my movement.

7) It is surprised at a loud sound.

8) When I ignore it, it makes an appeal to direct my attention toward it.

9) It changes its behavior depending on the tone of my voice.
